# Supplementary material for: Tumor Spreading to the Contralateral Ovary in Bilateral Ovarian Carcinoma Is a Late Event in Clonal Evolution
Source: PubMed Central journal article supplement (PMC2744120; doi:10.1155/2010/646340), 2009-09-15
Supplement: 646340.f1.pdf [file 646340.f1.pdf]

**Table 1. Bilateral Ovarian Carcinomas Examined by Karyotyping, High Resolution-CGH, and Microsatellite Instability Analysis (karyotypic similarities are indicated in bold)**

| Case/lab number | Diagnosis*                                                                   | Karyotype                                                                             | HR-CGH imbalances                                                                                                                                                                                                                                                                                                                                                                                                     | MS-status** |
|-----------------|------------------------------------------------------------------------------|---------------------------------------------------------------------------------------|-----------------------------------------------------------------------------------------------------------------------------------------------------------------------------------------------------------------------------------------------------------------------------------------------------------------------------------------------------------------------------------------------------------------------|-------------|
| 1a/49-99        | serous papillary cystadenocarcinoma, stage 3c, left ovary                    | 46,XX[14]                                                                             | rev ish enh(1p13,1p32p36,1q21q24,1q41q42,2p11,2p13,2p21,2p22p24,2q14,2q36,3p14p21,3p23,3p25,3q13q22,5p,5q11,5q12q13,5q33q34,8p11p12,8q23q24,9p12p21,9q13q21,9q32q34,10p11,10p13p14,10q11q21,10q22,10q24q26,11p11p12,11p14p15,11q13,11q22,11q23q25,12p12p13,12q23q24,13q32,15q24q26,19p13,20p11p13,20q),dim(X,4,6,8p21pter,13q12q21,15q14q21,16q21qter,17,18,19q13,22q11q13)                                           | ND          |
| 1b/49-99        | right ovary                                                                  | 71~77<3n>,XX,-X,+1,+3,-4,-6,+7,-8,+9,+10,-13,-17,-18,add(19)(p13)x2,+21,+3~9mar[cp11] | rev ish enh(1p11p21,1p22,1p32pter,1q21q31,1q32q43,1q44,2p11,2p13,2p21,2p22p25,2q11q12,2q14,2q35q37,3p14p21,3p22p25,3q21q23,5p,5q11q13,5q32q34,7q11,7q22,7q32q36,8p11p12,8q12q21,8q22qter,9p12p24,9q13q22,9q32q34,10p11p15,10q11,10q21q26,11p11p12,11p14p15,11q12q13,11q22q24,12p12p13,12q22q24,13q31q32,15q24q26,19p13,20p11p13,20q,21q21,21q22),dim(X,4,6,8p21pter,13q12q21,15q14q22,16q13qter,17,18,19q13,22q11q13) | MSS         |
| 2a/54-99        | serous papillary adenocarcinoma – poorly differentiated, stage 4, left ovary | 46,XX[27]                                                                             | rev ish enh(1p31p34,1q,2p11p25,2q11q12,3q12q13,3q24q28,5p12p15,6p,7q,8p11,10p14p15,11p11,12p,12q12q21,14q,16p11,16q12q13,18p11,19p13,19q13,20p11p13,20q,21q22),dim(Xp21pter,Xq21q28,3p14p26,4p13pter,5q14,6q16qter,7p21pter,8p12pter,9p13p24,13q13qter,16q22q24,22q),amp(12p12pter,12q13q14)                                                                                                                          | MSS         |

|             |                                                                                                |                                                                               |                                                                                                                                                                                                                                                 |     |
|-------------|------------------------------------------------------------------------------------------------|-------------------------------------------------------------------------------|-------------------------------------------------------------------------------------------------------------------------------------------------------------------------------------------------------------------------------------------------|-----|
| 2b/55-99    | right ovary                                                                                    | 56~81,add(11)(p13),add(14)(p11),add(18)(q23)x2,add(19)(q13),inc[cp8]/46,XX[8] | rev ish enh(1p32p34,1q21q32,2p11p25,3q25q28,5p,6p11p21,6p22p25,7q,8p11,8q21,10p15,11p11,12p,12q12q21,16q12q21,18p11,19p13,20p11,20q13),dim(Xp21p22,Xq26qter,3p22p26,4p13pter,6q22,6q24q27,8p12pter,9p21p24,13q14q34,16q23qter,22q12qter)        | MSS |
| 2c/56-99    | Omentum                                                                                        | 80~85,inc[2]/46,XX[101]                                                       | rev ish enh(1p32p34,1q31,1q32q41,2p11p14,2p15p25,3q25q29,5p13p15,6p22pter,7q31q35,8p11,8q12q21,8q23,10p11,12p12pter,12q12q21,15q25qter,18p11,20q11q13),dim(3p14p21,6q21q22,6q24q25,9p21p23,10q24,15q23q24,16p13,16q21q24,17p13,17q21,22q11qter) | MSS |
| 3a/63-99    | endometrioid and serous papillary adenocarcinoma - poorly differentiated, stage 4, right ovary | culture failure                                                               | no imbalances                                                                                                                                                                                                                                   | MSS |
| 3b/64-99    | left ovary                                                                                     | culture failure                                                               | no imbalances                                                                                                                                                                                                                                   | MSS |
| 4a/65-99    | serous papillary adenocarcinoma - moderately differentiated, stage 2c, right ovary             | culture failure                                                               | rev ish enh(1q21q43)                                                                                                                                                                                                                            | MSS |
| 4b/66-99    | left ovary                                                                                     | 46,XX[86]                                                                     | rev ish enh(1q)                                                                                                                                                                                                                                 | MSS |
| 5a/00-23*** | serous papillary adenocarcinoma – poorly differentiated, stage 3c, left ovary                  | 49~95,del(6)(q12),inc[2]/46,XX[3]                                             | rev ish dim(1p36,7q11,9q34,11q13,12q24,17p11p13,17q11q25,19)                                                                                                                                                                                    | ND  |

|           |                                                                                      |                                                                                                                   |                                                                                                                                                                                                                                                                                                                                                                                             |     |
|-----------|--------------------------------------------------------------------------------------|-------------------------------------------------------------------------------------------------------------------|---------------------------------------------------------------------------------------------------------------------------------------------------------------------------------------------------------------------------------------------------------------------------------------------------------------------------------------------------------------------------------------------|-----|
| 5b/00-24  | right ovary                                                                          | 46,XX[46]                                                                                                         | rev ish enh(8q24),dim(7q11,17p11,19p13,19q13)                                                                                                                                                                                                                                                                                                                                               | MSS |
| 6a/00-71  | endometrioid and serous papillary adenocarcinoma, stage 3c, right ovary              | 70~89,add(3)(p12),add(3)(p24),add(6)(q12),add(7)(p22),add(12)(p12), <b>add(16)(q24)</b> ,inc[3]/139~158,idemx2[4] | rev ish enh(1p31pter,1q21q25,1q32q41,2p16p23,2q33q34,2q35qter,3p14p21,3q13qter,4p16,5p13pter,6q13q14,7p11p14,7q11q31,7q32qter,8q23qter,9q13q22,10p11,10p12p14,11q12qter,12q24,14q13q31,15q23q25,16p11p12,19,20,22q11),dim(Xp11p22,Xq13qter,3p24pter,4q21qter,5q13q23,6q16qter,8p12pter,10q25qter,11p,13q13q31,13q32q34,15q11q21,17p,18q21qter,21)                                           | MSS |
| 6b/00-72  | left ovary                                                                           | 51~80,add(6)(q27)x2, <b>add(16)(q24)</b> x2,inc[2]/46,XX[10]                                                      | rev ish enh(1q21q43,2q22q32,5p13pter,5q13,5q14,8q23qter,10p13p15,10q11q21,12p11p13,17q21q25),dim(Xq22q25,1p33p35,3p13p24,4q22qter,6q24qter,8p21pter,8q13q21,9p21p23,11p12pter,11q22q24,13q21qter,14q13,14q23q24,16q21qter,17p,17q11q12,18q21q23,19q13,22q11qter)                                                                                                                            | MSS |
| 6c/00-73  | peritoneum                                                                           | 46,XX[12]                                                                                                         | rev ish enh(1p13p31,1p36,1q21q24,1q32q41,2p22p24,2q14,2q22q37,3q21qter,4p15p16,5p14p15,5q31qter,6p12p23,6q13q15,7q21qter,8q12,8q24,9p21p23,9q33,10p11p13,10q22,11q13q14,12p11pter,14q12q21,14q22q31,14q32,15q24,20p11p13),dim(Xp21,Xp22,Xq21q27,4q24qter,5q14q23,6q21q22,8p21p23,10q25qter,11p11p14,11q22q25,12q21q24,13q14q34,15q11q15,16p13,16q13q23,17p,17q21,18p11,18q21qter,21q,22q13) | MSS |
| 7a/00-118 | serous (papillary) cystadenocarcinoma – poorly differentiated, stage 3c, right ovary | 54~58,add(7)(q32),add(8)(p11),add(10)(p12),add(14)(p11),inc[cp5]/90~113,idemx2[cp6]                               | rev ish enh(1p13p31,1q21,1q31q43,2p13pter,2q21q37,3p12p14,3q,5p13p15,6p11p21,6p22,6q12q16,7q21q22,8q21qter,9p21pter,10q21q22,11p11p14,11q13q23,12p,12q13q22,13q21qter,14q12q21,14q22q31,15q25q26,20p11p12,20q11q13),dim(Xp11p21,Xq21,Xq23qter,1p34p35,4q24qter,5q14q15,5q33q34,6q26q27,7p11p21,7q34qter,8p12pter,9q13q22,10p11,10p13pter,13q12,                                             | MSS |

|              |                                                                                                |                                                                                                                                              |                                                                                                                                                                                                                                                                                                                                                                                                                                                                                                            |       |
|--------------|------------------------------------------------------------------------------------------------|----------------------------------------------------------------------------------------------------------------------------------------------|------------------------------------------------------------------------------------------------------------------------------------------------------------------------------------------------------------------------------------------------------------------------------------------------------------------------------------------------------------------------------------------------------------------------------------------------------------------------------------------------------------|-------|
| 7b/00-119    | left ovary                                                                                     | 46,XX[38]                                                                                                                                    | 15q11q14,15q15q21,16p13,16q21qter,17p11p13,17q11q21,17q22q23,19p13,21q,22q11qter),amp(3p24)<br>rev ish enh(1p13p31,1q21q31,1q41q42,2p12pter,2q11q23,3p12p21,3q,5q23q33,6p11p21,6q12q14,7q11q33,8q21qter,9p13pter,10q11q22,10q25,11p11p12,11q14q23,12p,12q14q21,13q21qter,20q),dim(Xp,Xq13,Xq21qter,3p24p25,4p13p14,4q13q22,4q25q26,4q31qter,5p13p14,5q12q21,6q21q27,8p21pter,9q22,10p13p14,12q24,13q12q14,14q21q24,14q31q32,15q13q24,16p12pter,17p11p13,17q11q22,18p11,18q12qter,19p13,22q11q13),amp(9p23) | MSS   |
| 7c/00-120    | peritoneum                                                                                     | 46,XX[99]                                                                                                                                    | no DNA available                                                                                                                                                                                                                                                                                                                                                                                                                                                                                           | --    |
| 8a/00-206    | serous papillary cystadenocarcinoma – mostly moderately and poorly differentiated, right ovary | 116~162, <b>add(4)(p15),add(5)(p13),del(7)(q31),der(8)t(8;13)(p23;q14),i(9)(q10),<b>add(11)(p15)x2,add(15)(p11)x2,inc[cp6]/46,XX[94]</b></b> | rev ish enh(Xq21,1p13p34,1q21q32,2p,2q11q12,3p12p14,3q,5p13pter,6p23,7p21,7q21,7q31q32,8p11p12,8q,9p12,9q21q33,10p13p14,10q25,11p11p14,12p11p12,12q12q21,14q24qter,20q12qter,21q),dim(Xp1pter,2q35q37,5q11q15,5q23q32,5q34qter,6q24q26,8p21,10q11q22,11p15,11q12q13,15q11q25,16,17,19p13,19q13,22q)                                                                                                                                                                                                        | MSS   |
| 8b/00-207    | left adnex                                                                                     | 102~125,-1, <b>add(4)(p14),add(5)(p15),add(11)(p14),add(13)(p11),add(15)(p11),add(16)(p13),inc[cp4]/46,XX[68]</b>                            | rev ish enh(Xq13,Xq21q26,1p13p21,1p22p36,1q21q25,1q31q32,2p11p25,2q11,2q13q14,2q21,3p13p21,3q13qter,5p13pter,6p21p25,7p12p14,7q11,7q21,7q22q31,8q11q21,8q24,10q25q26,11p12p14,12p12,12q13,14q24qter,19p13,19q13,20q11qter,21q21qter),dim(4q13,4q28,4q34,9p23p24,13q22,16q)                                                                                                                                                                                                                                 | MSS   |
| 8c/00-208    | peritoneum                                                                                     | 53~68,i(5)(p10), <b>add(11)(p14),add(11)(q25),inc[cp12]/46,XX[79]</b>                                                                        | rev ish enh(1p31p34,1q23q24,2p12pter,3p12p13,3q12q28,8q23,9q13q22,10q24q25,20q13),dim(Xq11qter,5q11q14,8p21p22,16p11p13,16q13q24,17p11p13,17q11q23,19q13,22q11qter)                                                                                                                                                                                                                                                                                                                                        | MSS   |
| 9a/00-253*** | serous papillary adenocarcinoma, stage 4,                                                      | 71~84,del(1)(p32)x2,add(11)(p14),inc[cp5]                                                                                                    | rev ish enh(Xq12,Xq13q21,Xq23q24,1p31,3q12q13,4p12p13,4q12q13,4q26q31,8q21qter,11q13q24,13q22q31,15q13q14),dim(1p34,4q22q23,5q13,5q34qter,6q21qter,                                                                                                                                                                                                                                                                                                                                                        | MSI-L |

|                 |                                                                              |                                                                                                                                                         |                                                                                                                                                                                                                                                                                                                                                                                                                        |       |
|-----------------|------------------------------------------------------------------------------|---------------------------------------------------------------------------------------------------------------------------------------------------------|------------------------------------------------------------------------------------------------------------------------------------------------------------------------------------------------------------------------------------------------------------------------------------------------------------------------------------------------------------------------------------------------------------------------|-------|
| 9b/00-254 ***   | right ovary                                                                  | 113~116,inc[5]                                                                                                                                          | 7p21pter,8p23,9p13,9q21qter,10q23qter,11p15,12q12q15,17p11p13,17q11q22,18p11,18q,19q13,21q22,22q11q13)                                                                                                                                                                                                                                                                                                                 | --    |
| 9c/00-255 ***   | left ovary<br>omentum                                                        | 75~76<3n>,X,-X,add(X)(p22),add(6)(q21),add(17)(q24),add(19)(p13),inc[cp6]/46,XX[5]/92,XXXXX[5]                                                          | no DNA available<br>rev ish enh(Xq21,1p21p22,1q23q25,2q22q24,2q31q32,3p12p14,4p12p13,4p14,4q12q21,4q26q31,5p14p15,6q12q13,8q12qter,10q21,11q13qter,14q11q12,14q21,14q24q32,20q13),dim(Xp11p21,1p34pter,4q22,5q21q22,5q35,6q21qter,7p11p13,7p15pter,7q11q31,7q31q33,8p22p23,9p12p21,9q21qter,10q23qter,11p15,12q12q21,13q12,13q14,16p11p13,16q22q24,17p,17q11q21,18p,18q11,18q12q23,19,21q22,22q11q13)                  | MSI-L |
| 10a/00-487      | serous papillary adenocarcinoma – poorly differentiated, stage 4, left adnex | 33~40,XX,add(1)(p34),inc[8]                                                                                                                             | rev ish enh(1p22,1p31,1q24,1q42qter,2p22p24,3p12p14,3p22p24,3q12q13,3q22qter,4p15pter,4q13,5p14,7q22q31,8q12q24,9q13q22,9q22q33,11q13q22,11q23q25,13q31q32),dim(Xp11p22,Xq13,Xq21q23,Xq24q26,2q14q21,2q34qter,4q23q26,4q31,4q34qter,5q13q14,5q23q31,6q23q26,7p21p22,8p12p23,9p13p23,10q11q21,10q25qter,11p15,13q12q21,14q22qter,15q12q14,16p11p13,16q13q24,17p,17q11q21,18p11,18q21q22,19p13,19q,20p13,21q22,22q11q13) | MSS   |
| 10b/00-488      | right adnex                                                                  | 38~42,XX,add(1)(p36),add(4)(q34),add(6)(q22),add(11)(p15),add(12)(p13),add(15)(p11),inc[cp6]/65~78,XXX,idem,add(6)(q22),add(12)(p13),inc[cp14]/46,XX[6] | rev ish enh(2q23q24,2q32,3q21qter,4p15,4q13,5p14,5q32q33,6p22pter,6q14q21,8q13qter,13q32),dim(Xp21p22,Xq21,Xq24,Xq25q26,2q14,2q37,3p21p24,4q35,5q13q14,6q23qter,7p22,8p12p23,10q21q22,10q25qter,11p15,12p12p13,12q24,13q12q21,14q31qter,15q12qter,16p12p13,16q22q24,17p11p13,17q11q21,18q21q23,19q13,20q12,21q22,22q11q13)                                                                                             | MSS   |
| 11a/00-694 **** | serous papillary adenocarcinoma – poorly differentiated, stage 4,            | 76~86<3n>,XX,-X,+1,del(3)(q23),-4,-5,del(6)(q15), <b>add(7)(q36),-8,+10,add(12)(p13),i(13)(q10),-14,-15,</b>                                            | rev ish enh(1p13p21,1p22p32,1q21q32,1q32q42,2p11,2p13,2p21pter,2q22q23,3p25p26,3q13,3q21qter,4p15,5p,6p11p21,6p22,6p24,6q12q16,6q22q23,6q26q27,7p12p13,7q11qter,8q13,8q22q24,10p11,10p13p15,10q11q21,10q22q23,                                                                                                                                                                                                         | MSS   |

|                     |                                                                                |                                                                                                                                                                                                                                                                                                                                                                           |                                                                                                                                                                                                                                                                                                                                                                                                                                                                                                                                                                                                                                                                                                                  |     |
|---------------------|--------------------------------------------------------------------------------|---------------------------------------------------------------------------------------------------------------------------------------------------------------------------------------------------------------------------------------------------------------------------------------------------------------------------------------------------------------------------|------------------------------------------------------------------------------------------------------------------------------------------------------------------------------------------------------------------------------------------------------------------------------------------------------------------------------------------------------------------------------------------------------------------------------------------------------------------------------------------------------------------------------------------------------------------------------------------------------------------------------------------------------------------------------------------------------------------|-----|
| 11b/00-695<br>***** | left ovary<br><br>right ovary                                                  | <p><b>add(16)(q24),der(19)t(8;19)(q24;q13),+20,der(22)t(19;22)(p13;q11),inc[cp9]</b></p> <p>67~80&lt;3n&gt;,XXX,+add(1)(p36),<b>add(7)(q36),-8,add(11)(p13),-13,-14,-15,add(15)(p11),<b>add(16)(q24),-17,?(17)(q10),-18,der(19)(19pter→19q13):hsr19p13→19q11:</b>,der(19)(19pter→19q11::19p13→19p13::19p13→19q11:),der(19)t(3;19)(q12;q13)+<b>20,-22,inc[cp5]</b></b></p> | <p>10q24q26,11q22,11q24,12p11,12q12q13,18q11q22,19p13,19q13,20,21q21),dim(Xp,Xq12q21,Xq21q27,2q37,5q23qter,7p22,8p11pter,9q22qter,11q12q13,12q14qter,13q12q21,13q21,14q11q31,15q11,15q13q24,15q26,16p12pter,16q,17,18p,19p13,22q)</p> <p>no DNA available</p> <p>--</p>                                                                                                                                                                                                                                                                                                                                                                                                                                          |     |
| 12a/00-953          | serous papillary adenocarcinoma – poorly differentiated, stage 3c, right ovary | 46,XX[16]                                                                                                                                                                                                                                                                                                                                                                 | <p>rev ish enh(1p13p31,1q21q31,2p,3p12,3p12p26,3q12q13,3q22q28,4q12q25,4q26q35,5p13pter,6q14q21,6q22q23,7p13p21,7q21,7q22q36,8q21,10p,11p12p15,11q14q22,13q,15q,16p12pter,20p11p13),dim(Xp22,1q32qter,2q13q21,2q24q31,2q33qter,4p15pter,5q11q14,5q23qter,6p21pter,8q24,9p12p13,9q34,10q21qter,11q13,12p,12q12q14,12q22qter,14q11q24,17p,18p11,18q12q23,19p,19q13,22q),amp(15q26)</p> <p>rev ish enh(1p21p31,1q23q31,2p,3p12p14,3p22p23,3p25,4q13,5p14p15,6q15q16,7p14p21,7q31,8q22,8q23,10p,11p15,11q14q22,13q21q33,15q,20p11p13,21q21),dim(Xp11,1p33p35,1p36,1q32qter,4p14,5q11q14,5q23q33,7q11,9p12p13,9q22qter,10q21qter,11q12q13,12p11p13,12q12q14,12q15,12q21qter,14q11,14q12q24,14q31q32,16q21q23,17p,</p> | MSS |
| 12b/00-954          | left ovary                                                                     | 46,XX[4]                                                                                                                                                                                                                                                                                                                                                                  | <p>rev ish enh(1p21p31,1q23q31,2p,3p12p14,3p22p23,3p25,4q13,5p14p15,6q15q16,7p14p21,7q31,8q22,8q23,10p,11p15,11q14q22,13q21q33,15q,20p11p13,21q21),dim(Xp11,1p33p35,1p36,1q32qter,4p14,5q11q14,5q23q33,7q11,9p12p13,9q22qter,10q21qter,11q12q13,12p11p13,12q12q14,12q15,12q21qter,14q11,14q12q24,14q31q32,16q21q23,17p,</p>                                                                                                                                                                                                                                                                                                                                                                                      | MSS |

|                 |                                                                                |                                                                             |                                                                                                                                                                                                                                                                                                                                                                                                                                                                                            |                 |     |
|-----------------|--------------------------------------------------------------------------------|-----------------------------------------------------------------------------|--------------------------------------------------------------------------------------------------------------------------------------------------------------------------------------------------------------------------------------------------------------------------------------------------------------------------------------------------------------------------------------------------------------------------------------------------------------------------------------------|-----------------|-----|
| 13a/00-955      | serous papillary adenocarcinoma – poorly differentiated, stage 3c, right ovary | culture failure                                                             | 17q21,18p11,18q21q22,19,22q)                                                                                                                                                                                                                                                                                                                                                                                                                                                               | MSS             |     |
| 13b/00-957      | left ovary                                                                     | culture failure                                                             | rev ish enh(Xp22,Xq13q21,Xq23q25,Xq26q28,1p21p31,1q31q42,2p,2q11q34,3p12p21,3q,4p12p13,4p15p16,4q12q21,4q28q31,5p13pter,5q14,5q34,6p12p21,6q12,8p22pter,8q,9p13pter,9q13q22,10p13pter,11p13p14,12q14,14q24q32,16q23qter,18q11q21,18q22q23,20q13),dim(1p33p36,3p24p25,4q22q27,4q32qter,5q13,6q25qter,7p,7q11,8p12,9q33q34,10q11q24,11p15,11q14q24,12p12p13,12q21qter,13q,14q12q23,15q,16p11p13,17p,17q11q24,19q13,20p11,20p13,22q12q13),amp(2p15p21,2p24pter,3q24q29,8q12q21,8q23q24,10p15) | not informative | MSS |
| 14a/00-977      | serous papillary cystadenocarcinoma, stage 3c, right ovary                     | culture failure                                                             | rev ish enh(1q21q22,1q41q42,2p11p12,2q11q22,3p12,3q,4q12q13,5p13,5q31q32,6p11p21,6p21p23,6q12q16,6q16q21,7p12,8q23q24,9p12p23,12p,12q12q13,13q21qter,14q11q21,16p11,19p13,19q13,20p11p13,20q11q12),dim(Xp21p22,4p15p16,4q26q34,5q12q21,8p12p22,8p23,10q11q21,11p15,11q22,11q23q24,13q12q14,14q24qter,15q14q21,15q22q24,17p11p12,17p13,18q22q23)                                                                                                                                            |                 | MSS |
| 14b/00-978      | left ovary                                                                     | 54~69,inc[2]                                                                | rev ish enh(2p11p13,2q11q24,2q31q32,3p12,3q,4q12q21,4q22q26,5p13p15,6p11p21,6p22p23,6q12q16,8q12q21,8q22q24,9p12p24,10p11p14,12p,12q12q13,13q21qter,14q11q21,18p11,18q11q21,19p13,19q13,20p11p13),dim(Xp21p22,3p14p21,3p23p24,4p16,4q31qter,5q12q15,7q11,7q22,7q34q36,8p11p23,9q22qter,10q11q21,10q23q25,11p15,11q12q14,11q23q25,12q24,13q12q14,14q23qter,15q12q24,16q13q24,17p11p13,17q11q21,18q22)                                                                                       | MSS             |     |
| 15a/00-1001**** | serous papillary cystadenocarcinoma –poorly                                    | 90~99,add(X)(p22),add(1)(p36),del(1)(q31),add(13)(p11),add(17)(p13),der(19) | no DNA available                                                                                                                                                                                                                                                                                                                                                                                                                                                                           | MSS             |     |

|             |                                                                                            |                                                                                                                     |                                                                                                                                                                                                                                                                                                                                                                                                                                                                                                                               |       |
|-------------|--------------------------------------------------------------------------------------------|---------------------------------------------------------------------------------------------------------------------|-------------------------------------------------------------------------------------------------------------------------------------------------------------------------------------------------------------------------------------------------------------------------------------------------------------------------------------------------------------------------------------------------------------------------------------------------------------------------------------------------------------------------------|-------|
| 15b/00-1002 | differentiated,<br>stage 3c,<br>left ovary<br><br>right ovary                              | (19pter→19q11::21q11→<br>21q22::2p23→2pter),+r,<br>inc[8]<br><br>65~86,add(1)(p34),add(7)<br>(p15),inc[5]/46,XX[21] | rev ish enh(Xq23qter,2p11p25,3p12p14,3p21p24,3q12q28,<br>7p11p12,7p13p21,7q11q33,8p11p12,8q,10p11p15,10q11q21,<br>14q11),dim(Xp11pter,1p33pter,2q37,4q33qter,5q12q21,<br>5q23q31,6p12pter,6q25,8p21p23,9p23p24,9q34,14q31qter,<br>16q21qter,17,18p11,18q21qter,21q21q22)                                                                                                                                                                                                                                                      | MSS   |
| 16a/00-1087 | serous papillary<br>adenocarcinoma –<br>poorly differentiated,<br>stage 3c,<br>right ovary | 46,XX[14]                                                                                                           | rev ish enh(1p22,1p31,1q21q31,2p21,2p22p24,2q14,<br>2q22q23,2q24,2q31q32,3p12p14,3p22p23,3q12q24,3q25,<br>3q27qter,4p15,4q13,5p13pter,5q14q23,6p21pter,6q15q16,<br>8q21qter,9p12p23,9q21,10q11q21,10q25qter,11q14qter,<br>13q31q32,14q21,18q12,21q21),dim(2p11p13,2q33qter,<br>4q31qter,6q22qter,7p21pter,7q21q31,7q31qter,8p11p21,<br>10p12p13,10q22q24,11p15,12p,12q12q14,12q24,13q14q22,<br>15q,16p11p13,16q21q24,17p11p13,17q24q25,20p11p13,<br>20q12,22q13), amp(5q15q21,8q22qter)                                       | MSS   |
| 16b/00-1088 | left ovary                                                                                 | 49~54,+r,inc[3] /46,XX[2]                                                                                           | rev ish enh(Xp21,Xp22,Xq12q27,1p13p31,1q21,1q41q43,<br>2p11p25,2q11q14,2q23q24,5p13pter,5q14q22,5q32qter,<br>6p21,6q21q23,7p11p21,7q11q21,8q12q13,8q21qter,9p13p23,<br>10q,11p11p14,11q13q23,12q15q23,13q12,13q22q34,<br>14q11q21,14q24q32,15q22qter,18q11qter,19q13,20q12q13,<br>21q,22q11q12),dim(1p33p36,2q33qter,3p12pter,3q12q28,<br>4p12p14,4q12q34,5q12q13,6p22,6q12q16,7q21q22,8p12p23,<br>9q34,10p12p15,11p15,12p11p13,12q12q13,12q24,13q14q21,<br>15q11q21,16p12p13,16q21q24,17p11p13,22q12),<br>amp(8q23q24,10q26) | MSI-L |
| 17a/01-805  | serous papillary<br>adenocarcinoma –<br>moderately and                                     | 67~92,XXX,del(1)(q31),<br><b>add(12)(p12),inc[3]/</b><br>46,XX[4]                                                   | rev ish enh(1p13,1p21p22,1p31,1q21q31,1q32q44,2p11p13,<br>2p16,2p21,2p23p24,2q11,2q13q14,2q21q24,2q31q36,3q,<br>4p15p16,5p13p15,5q11q23,5q32q33,6p12p21,6p22,6q12q15,                                                                                                                                                                                                                                                                                                                                                         | MSS   |



|                    |                                                                                           |                                                                                                                                                                                                                                                                       |                                                                                                                                                                                                                                                                                                                                                                                                                                                                                                                                                                                                                                                                                                |     |
|--------------------|-------------------------------------------------------------------------------------------|-----------------------------------------------------------------------------------------------------------------------------------------------------------------------------------------------------------------------------------------------------------------------|------------------------------------------------------------------------------------------------------------------------------------------------------------------------------------------------------------------------------------------------------------------------------------------------------------------------------------------------------------------------------------------------------------------------------------------------------------------------------------------------------------------------------------------------------------------------------------------------------------------------------------------------------------------------------------------------|-----|
| 17b/01-806<br>**** | poorly differentiated,<br>stage 3c,<br>right ovary                                        | 68~88<3n>,XX,-X,+1,+3,<br>+7,der(7)t(5;7)(q13;q36)x2,<br>der(8)t(8;19)(p11;q13)x2,<br><b>add(12)(p12)</b> x2,+13,<br>der(13;14)(q10;q10)x2,+14,<br>+15,-16,-17,-18,-19,<br>add(19)(q13),der(19)<br>(19pter→19q13::12p11→<br>12p13::Xp11→Xpter),-22,<br>+2~16mar[cp10] | 8p11p23,8q12q23,10p11,10p13p15,10q24q25,11q13q22,<br>11q24,12p,13q21,13q22q32,15q24q26,20p11p13,20q),<br>dim(X,1p34,3p14p21,4q,6q16qter,9p12p23,9q21qter,<br>10q11q22,11p11p15,12q13,12q14,12q15q21,12q23q24,16p,<br>16q13qter,17p,17q11q22,17q23,18,19q13,21q21qter,22q),<br>amp(12p)<br><br>rev ish enh(1p21p31,1q23q25,2p23p24,2q14,2q21q24,2q31,<br>2q32,2q35,3p12p21,3p21p26,3q12q13,3q21q24,5p13,<br>5p14p15,5q11q23,5q32q34,6q14q16,6q22,7p14p21,7q31,<br>7q34,8q,9p21p24,11p12p15,11q14q22,11q23q24,12p,<br>13q21q32,15q24q26,20p12),dim(X,1p32p35,4,7q11,<br>8p12p23,9q22q31,10p11p14,10q,12q23q24,14q23q24,<br>14q31q32,16p11p13,16q13q24,17,18,19p13,19q,21q,<br>22q11q13),amp(12p) | MSS |
| 18a/01-837         | serous papillary<br>adenocarcinoma –<br>poorly differentiated,<br>stage 3c,<br>left ovary | Culture failure                                                                                                                                                                                                                                                       | rev ish enh(Xq,1p13,1p21p31,1q,2p11p21,2q11q36,3p12p14,<br>3q12q28,4p14p15,5p12p15,5q14q35,6p,6q12q24,7q21,<br>7q32q36,9p,9q13q21,10p11,10p13p15,10q11q21,11q13qter,<br>12p,12q12,13q21q33,14q11q21,16q12,18q11q12,20p11p13,<br>21q21),dim(Xp11p22,1p32pter,2p22pter,3p21,4q12q28,<br>4q28q35,5q12q14,7p11p13,7q11,7q22q31,8p11p23,8q12q22,<br>8q24,9q31qter,10q22q24,11p11pter,12q15q21,12q23q24,<br>13q12q14,14q22qter,15q11q24,16p12,16q21qter,17p,<br>17q11q21,18q12q23,19p13,19q13,21q22,22q),amp(3p12p13,<br>3q12q13,3q22q26)                                                                                                                                                            | MSS |
| 18b/01-838<br>**** | right ovary                                                                               | 70~79,XX,+i(X)(p10),i(X)<br>(p10),dup(1)(q21q44),add(2)<br>(q37),add(3)(q29)x2,i(4)<br>(q10),add(6)(q27),add(11)<br>(q14),i(17)(q10),der(19)                                                                                                                          | rev ish enh(Xq12q13,1p12p13,1q21q43,2p11p21,2q11q32,<br>2q33q36,3p12p14,3q12q28,4p15p16,5p13p15,5q21qter,<br>6p11p24,6q12q16,6q22q23,7q32q36,9p12p23,9q13q21,<br>10q11q21,10q25,11q12q25,12p,12q12,12q23q24,14q11q12,<br>16p11p13,17q21qter,19p13,19q13,20p11p13,20q11q12),<br>amp(3p12p13,3q22q26)                                                                                                                                                                                                                                                                                                                                                                                            | MSS |

|             |                                                                                      |                                                                                                                                                         |     |
|-------------|--------------------------------------------------------------------------------------|---------------------------------------------------------------------------------------------------------------------------------------------------------|-----|
|             | <p>t(6;19)(p12;q13),der(19)(19pter→19q11::19q11→19p13::18q11→18qter),inc[cp12]</p>   | <p>dim(Xp11p22,2p24pter,4q13qter,5q12q14,7q31,8p12p23,8q13q22,9q31q32,10q22q23,11p14p15,12q14q21,13q12q13,14q21qter,15q14q22,16q22q23,17p,18q12q23)</p> | MSS |
| 19a/02-192  | <p>serous papillary adenocarcinoma – well differentiated, stage 3b</p>               | <p><b>54,XX,+X,+5,+8,+12,+14,+14,+16[1]/52,XX,+X,+5,+8,+8,inv(10)(p12q22),+12,+der(16)t(14;16)(q13;q22),del(17)(p12)[11]</b></p>                        | MSS |
| 19b/02-193  |                                                                                      | <p><b>54,XX,+X,+5,+8,+12,+14,+14,+16[5]/52,XX,+X,+5,+8,+8,inv(10)(p12q22),+12,+der(16)t(14;16)(q13;q22),del(17)(p12)[9]/46,XX[3]</b></p>                | MSS |
| 20a/02-706  | <p>serous papillary adenocarcinoma – poorly differentiated, stage 3c, left ovary</p> | <p>46,XX[20]</p>                                                                                                                                        | MSS |
| 20b/02-707  | <p>right ovary</p>                                                                   | <p>50~55,X,-X,+der(1)(1qter→1p36::1q21→1qter),+2,+add(8)(p21),+12,+16,-19,-22,+3~8mar[cp6]</p>                                                          | --  |
| 21a/02-1149 | <p>carcinosarcoma (heterologous type), stage 4,</p>                                  | <p>46,XX,add(16)(q22)[4]/66,del(1)(p32)x2,+del(1)</p>                                                                                                   | MSS |

|               |                                                                                      |                                                                                                                                               |                                                                                                                                                                                                                                                                                                        |     |
|---------------|--------------------------------------------------------------------------------------|-----------------------------------------------------------------------------------------------------------------------------------------------|--------------------------------------------------------------------------------------------------------------------------------------------------------------------------------------------------------------------------------------------------------------------------------------------------------|-----|
| 21b/02-1150   | left ovary<br><br>right ovary                                                        | (q11)x2,+der(2)t(2;12)(q35;q11)x2,add(16)(q22),<br><b>der(16)t(1;16)(q21;q22)</b> ,<br>inc[cp4]<br>46,XX, <b>der(16)t(1;16)(q21;q22)</b> [11] | 1p32pter,2q37,3q21q22,4,6q22qter,9p12p13,9q22qter,12q22qter,15q,17p,17q21q23,19p13,19q13,22q13),<br>amp(3q25q27,6q21,20p11pter)<br><br>no DNA available                                                                                                                                                | --  |
| 22a/03-246*** | serous papillary<br>cystadenocarcinoma,<br>stage 3c,<br>right ovary                  | culture failure                                                                                                                               | no imbalances                                                                                                                                                                                                                                                                                          | MSS |
| 22b/03-247*** | left ovary                                                                           | 46,XX[5]                                                                                                                                      | not informative                                                                                                                                                                                                                                                                                        | MSS |
| 23a/03-375    | endometrioid<br>adenocarcinoma –<br>well differentiated,<br>stage 1c,<br>right ovary | culture failure                                                                                                                               | rev ish enh(1q,2q22q24,3p14,3p22p23,5q14,5q21,9p23,13q22),dim(1p31p36,5q35,7q11,9q22,9q33qter,11q13,12q23q24,15q22q23,16p11p13,17p11p13,17q11q21,17q22q25,19p13,19q,22q11q13),amp(1q24q31,1q32)                                                                                                        | MSS |
| 23b/03-376    | left ovary                                                                           | culture failure                                                                                                                               | rev ish enh(1p22,1q,2q22q24,3p12p13,3p23,5q14,5q15,5q21,6q22,8q22,9p13p21,9p23,13q22,13q31),dim(Xp11,Xq12,1p32pter,2p16,7p11p12,7q11q21,9q22,9q33qter,10p12,10q23,11q12q13,12p13,12q23qter,13q12,15q22q24,16p11p13,16q21q24,17p,17q11q21,17q22q25,19p13,19q13,20q11q12,22q11q13),amp(1q24q31)          | MSS |
| 24a/03-518*** | adenocarcinoma<br>NOS– poorly<br>differentiated,<br>stage 3c,<br>left ovary          | 46,XX[93]                                                                                                                                     | rev ish enh(2q31q32,3q25q26,4q13,4q21,4q24q28,5p14,6p,6q12q23,7q21,7q22q31,8q,9p13p24,10p11,11p14p15,12p11p13,15q21q23,15q24),dim(Xp11,1p32p36,2p14p15,2p16p21,2p22,3p21,4p16,5q23q31,7p21p22,9q34,10q25q26,11q13,11q23,12q13,12q23q24,13q12,13q33q34,14q13q24,14q31q32,16p11p13,16q21q24,17p,17q,19p, | MSS |

|                     |                                                                                       |                                                                                                                            |                                                                                                                                                                                                                                                                                                                                                                                                                                                   |     |
|---------------------|---------------------------------------------------------------------------------------|----------------------------------------------------------------------------------------------------------------------------|---------------------------------------------------------------------------------------------------------------------------------------------------------------------------------------------------------------------------------------------------------------------------------------------------------------------------------------------------------------------------------------------------------------------------------------------------|-----|
| 24b/03-519<br>****  | right ovary                                                                           | 46,XX[66]                                                                                                                  | 19q13,22q11q13)<br>rev ish enh(2q22q24,2q31q34,3q13,4q13q32,5p14p15,5q14q21,6p12p21,6p22,6p24,6q14q21,6q22q23,7q22,7q31q32,7q33,8q,9p13p24,10p11,10p12p14,11p14p15,12p,18q22,20p12p13),dim(Xp11p21,Xp21p22,Xq12q13,1p31p36,3p21,5q23q31,8p12,8p21,8p22p23,10q21q24,10q25q26,11q23,12q22q24,16p11p13,16q22q24,17p11p13,17q11q25,19p13,19q,22q11q13)                                                                                                | ND  |
| 25a/03-1003<br>**** | serous papillary carcinoma—moderately and poorly differentiated, stage 3c, left ovary | 36~44,del(4)(p12), <b>add(11)(p15)</b> , <b>add(19)(p13)</b> , <b>add(19)(q13)</b> ,inc[cp20]                              | rev ish enh(1q21q31,2q22q37,3p,3q12q13,4q12q13,5p,6p24,7p11p12,7q,8q22qter,9p21p22,9p23,9q32q34,10p11,10q11q21,11p11p14,11q14,12p,14q22qter,15q24qter,18q11q12),dim(1p31p32,1p36,2p14p22,2p24pter,2q11q21,4q24q31,4q32qter,5q12qter,6q16q23,8p,8q11q21,11p15,11q23qter,12q24,13q21qter,15q13q22,16p,16q13qter,17p,17q11q23,18q21qter,21q21qter,22q),amp(2q24q32)                                                                                  | MSS |
| 25b/03-1004         | right ovary                                                                           | 46,XX[52]                                                                                                                  | rev ish enh(1p13p21,1p34p35,1q21q32,1q41,2p13,2q22q37,3p12p21,3p21p25,3q12q22,3q24q28,4p15,5p,6p21,6q12q14,6q24qter,7q11qter,8q22qter,9p21pter,10q21,10q25qter,11p11p14,11q14q22,12p,12q14q15,12q21,14q21qter,15q25qter,18q12),dim(Xq21q26,1p31,2p22pter,2q11q14,4q25q31,4q33qter,5q21qter,6q21q22,7p21pter,8p,8q11q21,11p15,11q23qter,12q24,13q21qter,15q11q23,16q22qter,17p,17q11q24,18q21qter,19p13,19q,21q,22q),amp(2q24q32,7q35q36,8q23qter) | MSS |
| 25c/03-1005<br>**** | omentum                                                                               | 39~41,del(1)(p31),der(11) <b>add(11)(p15)</b> dup(11)(q14q22), <b>add(19)(q13)</b> ,?add(22)(q13),inc[cp9]/75~79,idemx2[3] | rev ish enh(1q21q31,2q22q37,3p14p26,5p13p15,6p25,6q23q26,7q,8q22qter,9p12p21,9p23p24,9q32q33,10q11,11p12p14,12p11pter,14q22qter,15q24qter,18p11),dim(1p22p31,2q11q21,4p16,4q24q28,4q31q35,5q21qter,6q21q22,8p,8q11q21,11q23q25,13q21qter,15q15q22,16p,16q13qter,17p11,17q11q22,18q21q23,21q21q22,22q11q12,                                                                                                                                        | MSS |

|                    |                                                                                                                                 |                                                                                         |                                                                                                                                                                                                                                                                                                                                                                                                                         |     |
|--------------------|---------------------------------------------------------------------------------------------------------------------------------|-----------------------------------------------------------------------------------------|-------------------------------------------------------------------------------------------------------------------------------------------------------------------------------------------------------------------------------------------------------------------------------------------------------------------------------------------------------------------------------------------------------------------------|-----|
| 26a/03-1178        | mucinous<br>cystadenocarcinoma<br>– well differentiated,<br>stage 2c,<br>left ovary                                             | 46,XX[7]                                                                                | 22q13,amp(12p13)                                                                                                                                                                                                                                                                                                                                                                                                        | MSS |
| 26b/03-1179        | right ovary                                                                                                                     | 47,XX,+add(1)(p13),add(11)(q13)[5]/46,XX[15]                                            | no imbalances                                                                                                                                                                                                                                                                                                                                                                                                           | MSS |
| 27a/04-24          | endometrioid and<br>serous papillary<br>adenocarcinoma–<br>moderately and<br>poorly differentiated,<br>stage 2c,<br>right ovary | 65~79<3n>,X,-X,-X,del(3)(p11),-4,-5,i(8)(q10),der(13;14)(q10;q10),add(15)(p11),inc[cp9] | rev ish enh(1p22,1p31,1q23q25,2p13p25,2q21q37,3p12,3p13,3q12q21,3q22q26,4q12q34,5p,6p21,6q12q22,7p21p22,7q21q31,8p11,8q,11p11p14,11q14q22,18q11q23),dim(Xp11p21,Xp22,1p34pter,1q42,6q25q27,8p12pter,9p12p21,9q21qter,13q12q14,13q33q34,14q21qter,17,19p13,19q,22q11q13),amp(8q13q22,8q22q23)                                                                                                                            | MSS |
| 27b/04-26          | left ovary                                                                                                                      | 58~73<3n>,XXX,-4,-5,-5,+8,i(8)(q10)x2,-14,-19,inc[cp10]                                 | rev ish enh(1p13p32,1q21q41,2q22q24,2q32q33,3p12p14,5p14p15,6p12,6q12q24,7p14pter,7q21,7q31q32,8p11,8q,11p,11q14q23,11q23q25,12p,12q12,12q21,14q11q13,15q21q22,15q24q26,16q12q21,18q11q12,18q22qter,20p11p13,21q21),dim(X,1p34p36,3q28q29,4q31qter,5q11q14,7q36,8p12pter,9p12p23,9q21qter,10q,12q24,13q12q21,13q33qter,14q21qter,17,19p13,19q,22q),amp(8q13qter)                                                        | MSS |
| 28a/04-101<br>**** | clear cell and serous<br>papillary<br>adenocarcinoma,<br>stage 3b,<br>right ovary                                               | 63~70,add(12)(p13),add(19)(q13),inc[cp9]                                                | rev ish enh(Xp21p22,Xq13q21,Xq22q24,Xq25q27,1p31,2p,2q11q14,2q22q24,2q32,2q33,3,4p15,5p13p15,5q11q34,7p13p14,7p15p21,8p11,8q,9p13p23,10p11p12,10p13p15,10q11q23,13q22q31,13q31q32,20q,21q21q22),dim(1p32p36,1q25q43,2q37,6p21p22,7q11,7q21q22,9q22q32,9q33q34,10q23qter,11p,11q12q13,12q13q14,12q23q24,13q12q13,14q11q24,15q11q24,16p11p13,16q,17p11pter,17q11q22,18q,19p13,19q13,20p11p12,22q11),amp(3q24q26,10q21q22) | MSS |

|                    |                                                                            |                                                                              |                                                                                                                                                                                                                                                                                                                                                                                                                                                       |     |
|--------------------|----------------------------------------------------------------------------|------------------------------------------------------------------------------|-------------------------------------------------------------------------------------------------------------------------------------------------------------------------------------------------------------------------------------------------------------------------------------------------------------------------------------------------------------------------------------------------------------------------------------------------------|-----|
| 28b/04-102         | left ovary                                                                 | 67~69,inc[6]                                                                 | rev ish enh(Xp11p21,Xq21,Xq22q25,Xq26q27,1q23q24,2p11,2p12p25,2q11q14,2q23q24,3p12,3p13p14,3p21p26,3q,5p13p15,5q11q23,5q31q34,6p23p25,6q15q16,7p13p21,7q21q32,8q,9p13p24,10q21q22,20q),dim(1p31p36,1q31q43,2q37,4q34qter,6q24q26,9q22q32,9q33qter,10p11p12,10q23qter,11p11p15,11q12q13,12q13,12q23q24,13q12q14,14q,15q11q24,16p11p13,16q13qter,17p,17q11q23,18q,19p13,19q13,20p11p13,21q22,22q11q13),amp(10q21q22)                                    | MSS |
| 29a/04-186<br>**** | endometrioid adenocarcinoma - poorly differentiated, stage 2c, right ovary | 67~73,del(X)(q23),del(1)(q21),?add(11)(p15),der(19)t(1;19)(p32;p13),inc[cp8] | rev ish enh(Xq12,1p12p21,1p31p32,1q,2p12p13,2p23p25,2q22q24,3q,4p15,4q26q28,5p14,5q14q35,6p11p25,6q12q15,7q22qter,8q21qter,9p12p13,9q13q21,10p,10q11q22,11q,12p11p12,12p13,12q12q14,14q11q13,15q23qter,16q12q21,17q22qter,18p11,18q11q21,20q12qter),dim(Xq21q23,1p22p31,3p13p24,4p12p14,4q12q25,4q31qter,5q11q12,6q22q24,7p13p22,7q11,8p12pter,9p21p23,9q22qter,10q22q24,11p11p15,13q,14q24q31,17p,17q11,19p13,19q,21q,22q),amp(8q22qter)             | MSS |
| 29b/04-187         | left ovary                                                                 | 46,XX[3]                                                                     | rev ish enh(Xp11,Xq12,Xq13,Xq23q27,1p13,1q,2p11p12,2q13q14,2q22q24,2q36,3p13,3p14,3q,5p13pter,5q32q35,6p12pter,6q16,7q11,7q32qter,8q22qter,9p12p21,9q13q22,10p11,10p12pter,11q12q14,15q13qter,16p11p13,16q12q24,17q22,17q24q25,18p11,18q12q21,19p,19q13,20p11p12,20q11q13),dim(1p22p31,1p35pter,2p16,3p21p22,4p,4q12q26,4q31qter,5q11q13,6q22qter,7p14pter,8p12pter,9q31qter,10q22q24,11p12pter,12q15q24,13q33qter,17p,17q11,19q13,22q),amp(1q32qter) | MSS |
| 30a/04-919<br>**** | serous adenocarcinoma, stage 3c, right ovary                               | 38~42,add(3)(p24),add(19)(p13),+r,inc[cp10]                                  | no DNA available                                                                                                                                                                                                                                                                                                                                                                                                                                      | --  |

|             |                                                                                   |                                                                                                    |                                                                                                                                                                                                                                                                                                                                                          |     |
|-------------|-----------------------------------------------------------------------------------|----------------------------------------------------------------------------------------------------|----------------------------------------------------------------------------------------------------------------------------------------------------------------------------------------------------------------------------------------------------------------------------------------------------------------------------------------------------------|-----|
| 30b/04-920  | left ovary                                                                        | 39~46,X,del(1)(q21),add(3)(p24),add(4)(q34),add(19)(p13),+r,inc[cp9]/74~85, idemx2[cp10]/46,XX[34] | no DNA available                                                                                                                                                                                                                                                                                                                                         | --  |
| 31a/04-1049 | endometrioid adenocarcinoma - poorly differentiated, stage 4, left ovary          | 46,XX[8]                                                                                           | rev ish enh(8q11q24),dim(9q34)                                                                                                                                                                                                                                                                                                                           | MSS |
| 31b/04-1051 | right ovary                                                                       | 42,XX[42]                                                                                          | rev ish enh(3p12,3q12q13,5q14,5q21,6p11p12,6q12q21,6q21q23,9p24,13q21q31,21q21),dim(2q37,3p21,7q35,9q34,10q25q26,11q13,12p13,12q23q24,14q31,15q22q24,16p11p13,16q22q24,17p12p13,17q11q21,17q22q25,19p13,19q13,20q13,22q)                                                                                                                                 | MSS |
| 32a/04-1066 | serous papillary adenocarcinoma - moderately differentiated, stage 4, right ovary | culture failure                                                                                    | rev ish enh(1p21p31,1q21q41,2p16,2q21q32,3p12p14,3p24,3q12q26,4p12p16,4q12q31,5p12p15,5q14q31,6p12,6q12q24,7q31,8q,11p15,11q14q22,12p11p13,13q14q31,18q11q12),dim(Xp11p21,Xp22,Xq12q21,Xq27q28,1p33pter,2q37,6q25qter,7q11,7q36,8p21pter,9p12p13,9q21qter,10q26,11q13,12q23qter,14q32,15q22q23,16,17p,17q11q21,18q22,19,20q11q12,21q22,22q),amp(8q13q23) | MSS |
| 32b/04-1067 | left ovary                                                                        | culture failure                                                                                    | not informative                                                                                                                                                                                                                                                                                                                                          | ND  |

\* Stage according to FIGO (International Federation of Gynecology and Obstetrics).

\*\*MSS: microsatellite stable, MSI-L: microsatellite unstable-low; ND: not detectable.

\*\*\* Tumors from patients who had received neoadjuvant therapy.

\*\*\*\*Tumor karyotypes also published in Genes, Chromosomes and Cancer 2009, 48(2):184-93.
